# Supplementary material for: Splice modulators target PMS1 to reduce somatic expansion of the Huntington’s disease-associated CAG repeat
Source: PubMed Central journal article supplement (PMC11015039; doi:10.1038/s41467-024-47485-0), 2024-04-12
Supplement: 41467_2024_47485_MOESM1_ESM.pdf [file 41467_2024_47485_MOESM1_ESM.pdf]

## Contents

|                                      |    |
|--------------------------------------|----|
| Supplementary Figure 1 .....         | 2  |
| Supplementary Figure 2 .....         | 3  |
| Supplementary Figure 3 .....         | 4  |
| Supplementary Figure 4 .....         | 6  |
| Supplementary Figure 5 .....         | 7  |
| Supplementary Figure 6 .....         | 8  |
| Supplementary Figure 7 .....         | 9  |
| Supplementary Figure 8 .....         | 10 |
| Supplementary Figure 9 .....         | 11 |
| Supplementary Figure 10 .....        | 12 |
| Supplementary Figure 11 .....        | 13 |
| Supplementary Figure 12 .....        | 14 |
| Supplementary Figure 13 .....        | 15 |
| Supplementary Table 1: primers ..... | 16 |
| Supplementary Table 2: sgRNAs .....  | 17 |

# Supplementary Figure 1

a

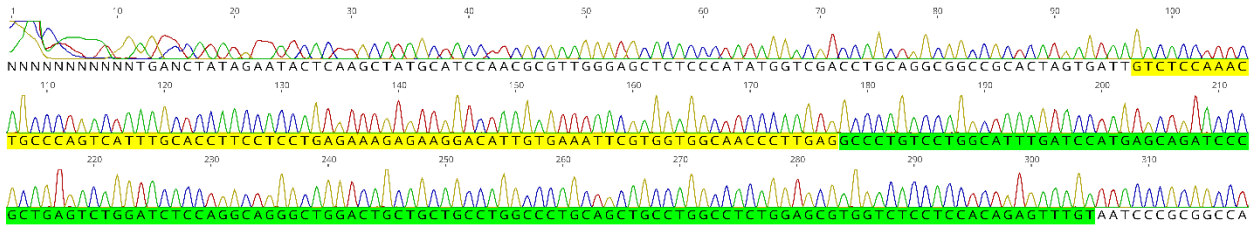

b

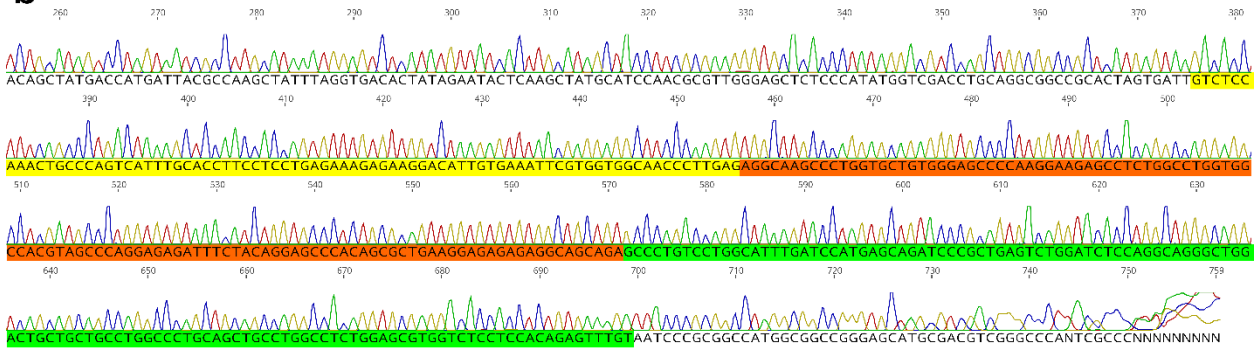

c

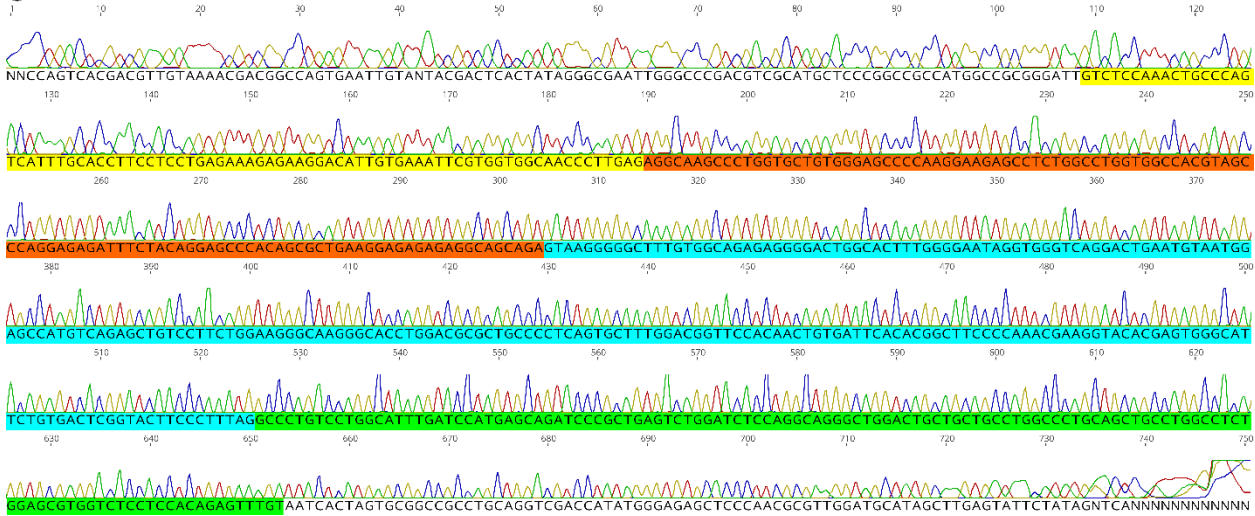

Supplementary Figure 1. Sanger sequencing for TA-cloned PCR fragments for: (a) *HTT* canonical exon 49-50 splicing, (b) pseudoexon inclusion exon 49-50a-50, (c) alternative splice site exon 49-50b. Yellow is exon 49 sequence, orange is exon 50a, blue is the entire intronic sequence between exon 50a and exon 50, green is exon 50.

# Supplementary Figure 2

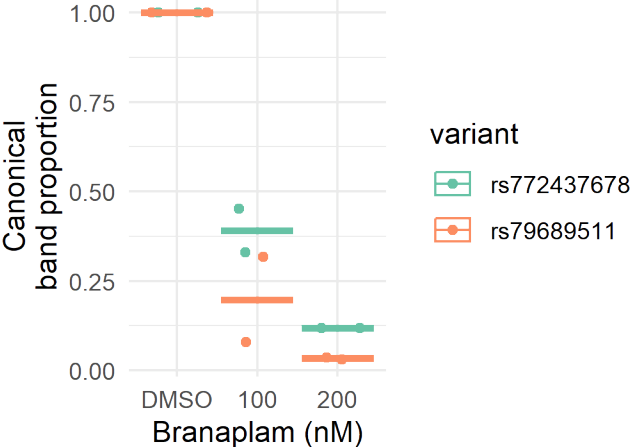

Supplementary Figure 2. Genetic variants and *HTT* splice modulation. Canonical *HTT* exon 49-50 for cell lines containing variants rs79689511 (orange) and rs772437678 (teal) for 100 and 200 nM branaplam. Source data are provided as a Source Data file.

# Supplementary Figure 3

a

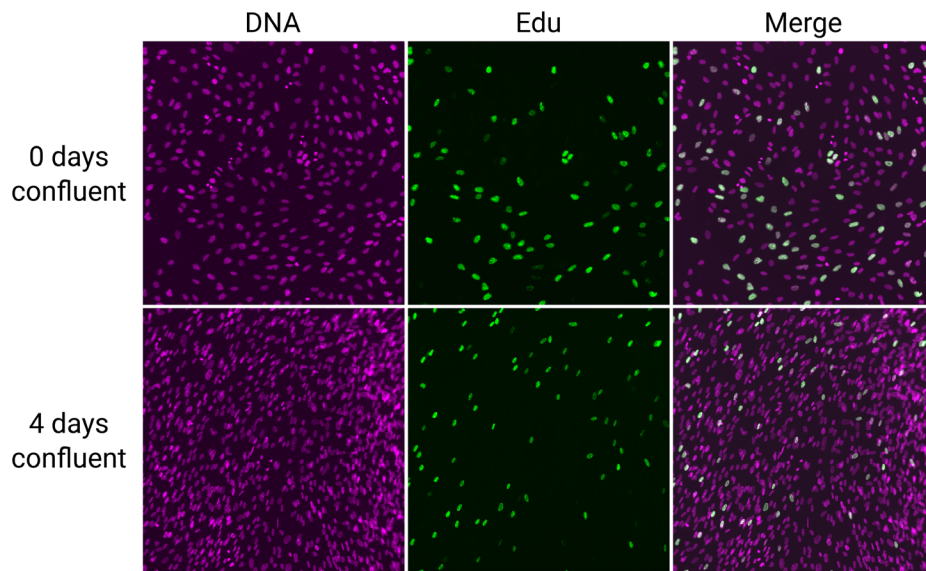

b

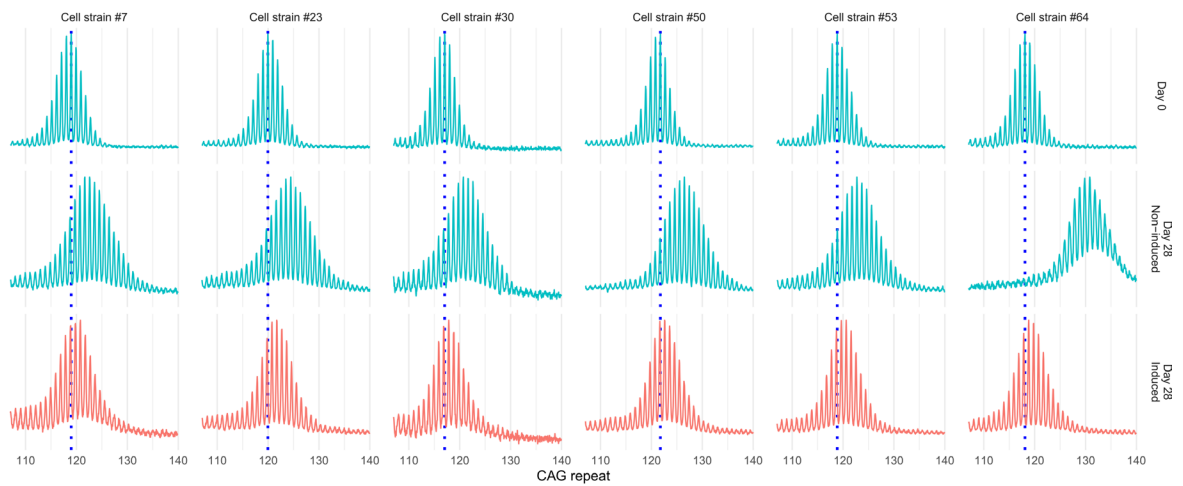

c

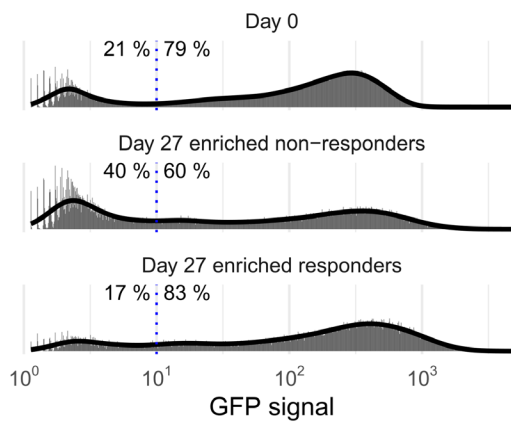

d

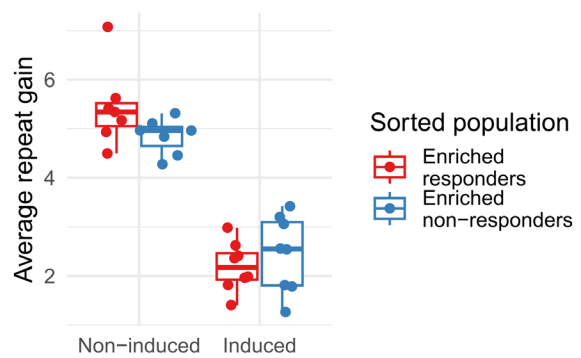

Supplementary Figure 3. RPE1-AAVS1-CAG115 cell cycle analysis, repeat traces, and instability of transgene doxycycline non-responders. (a) Representative images for S-phase image analysis, showing DNA and Edu stains for cultures confluent for 0 and 4 days. (b) CAG repeat traces of different clonal cell strains showing the change in repeat distribution from day 0 (top) for non-induced (middle, blue) and induced (bottom, red) at day 28. (c) GFP signal analyzed by flow cytometry at day 0 (top) which was used to separate GFP negative (non-responders) and GFP positive (responders) populations. These populations were then used for parallel repeat instability experiments. After 27 days, the initial non-responders (middle) and initial responders (bottom) were analyzed for GFP signal. The proportion of the population to the left (GFP-negative) or right (GFP-positive) of the dotted line is given for each population. (d) Average repeat gain for the initial responders (red) or initial non-responders (blue), compared to the sorted population of each at day 0, either non-induced or induced with doxycycline. For each group 7-8 cultures were analyzed. Box plots show the 25th and 75th percentiles (box), median (horizontal line), and range (whiskers, which are capped at 1.5x the inter-quartile range). Source data are provided as a Source Data file.

# Supplementary Figure 4

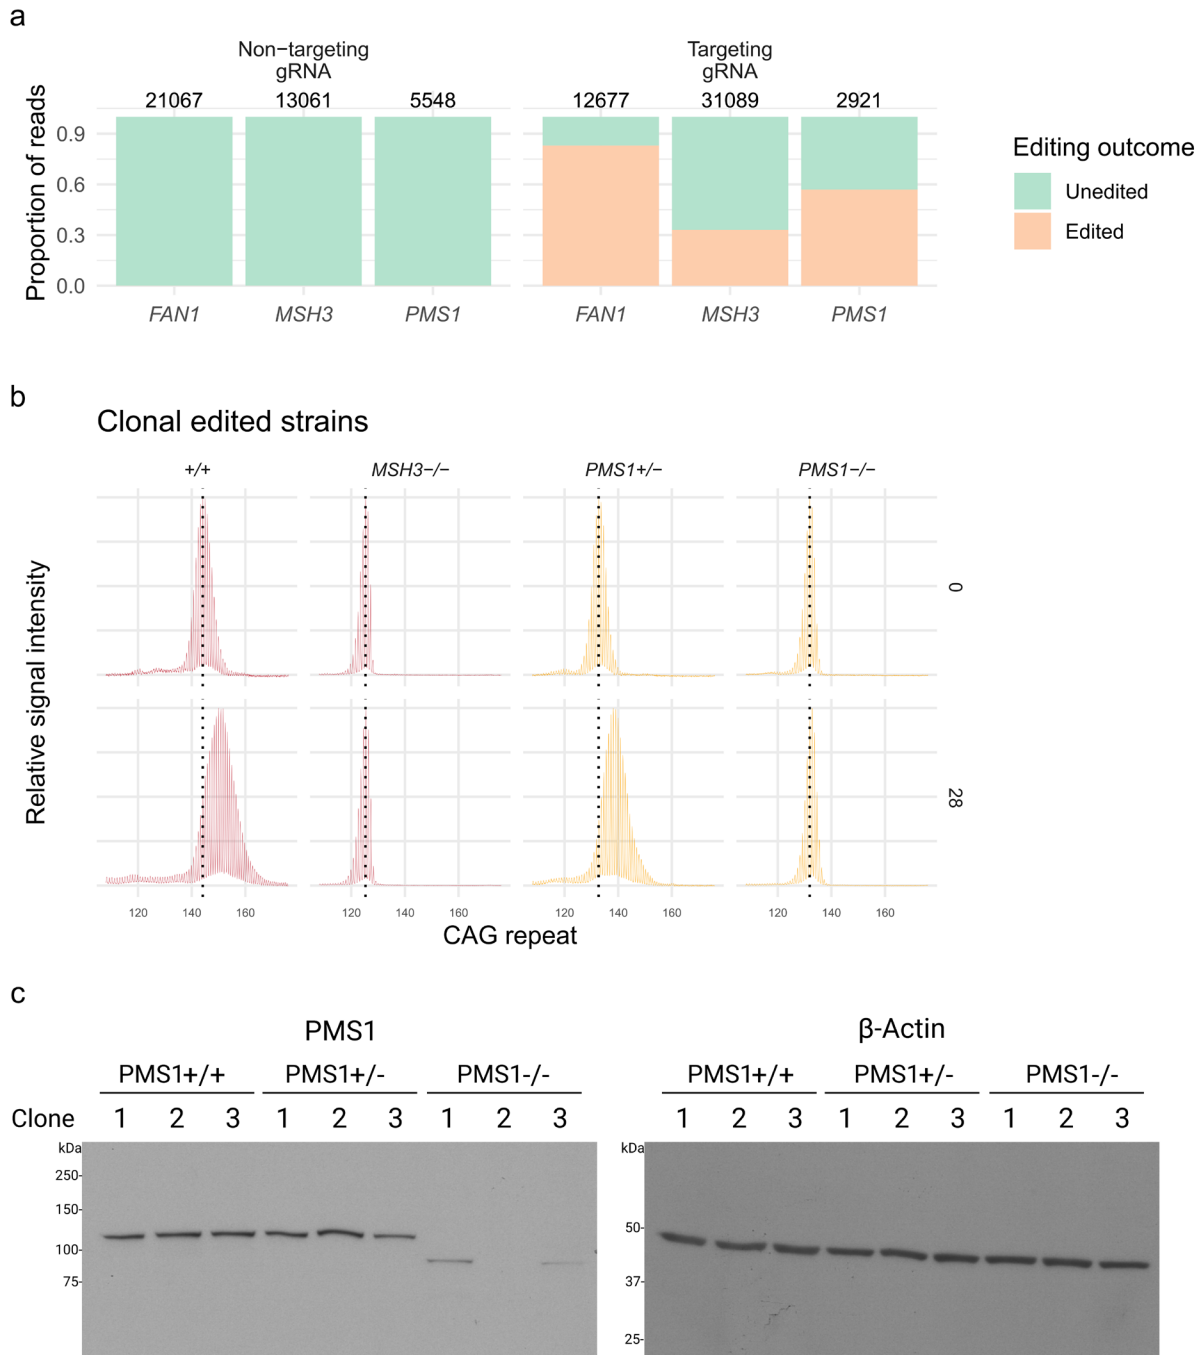

Supplementary Figure 4. RPE1-AAVS1-CAG115 HD modifier genome editing. (a) Proportion of edited reads in samples transfected with either non targeting or targeting gRNAs in RPE1-AAVS1-CAG115. The numbers above the bars indicate the total reads analyzed. (b) Representative fragment analysis traces of isolated clonal edited strains from either *MSH3* (red) or *PMS1* (orange) targeted populations. (c) Western blot for *PMS1* and beta-Actin for the *PMS1* non-edited cell clones (*PMS1*<sup>+/+</sup>), heterozygously edited (*PMS1*<sup>+/-</sup>) and homozygously edited (*PMS1*<sup>-/-</sup>). The samples are from a single experiment with three biologically independent cell clones per genotype. Source data are provided as a Source Data file .

# Supplementary Figure 5

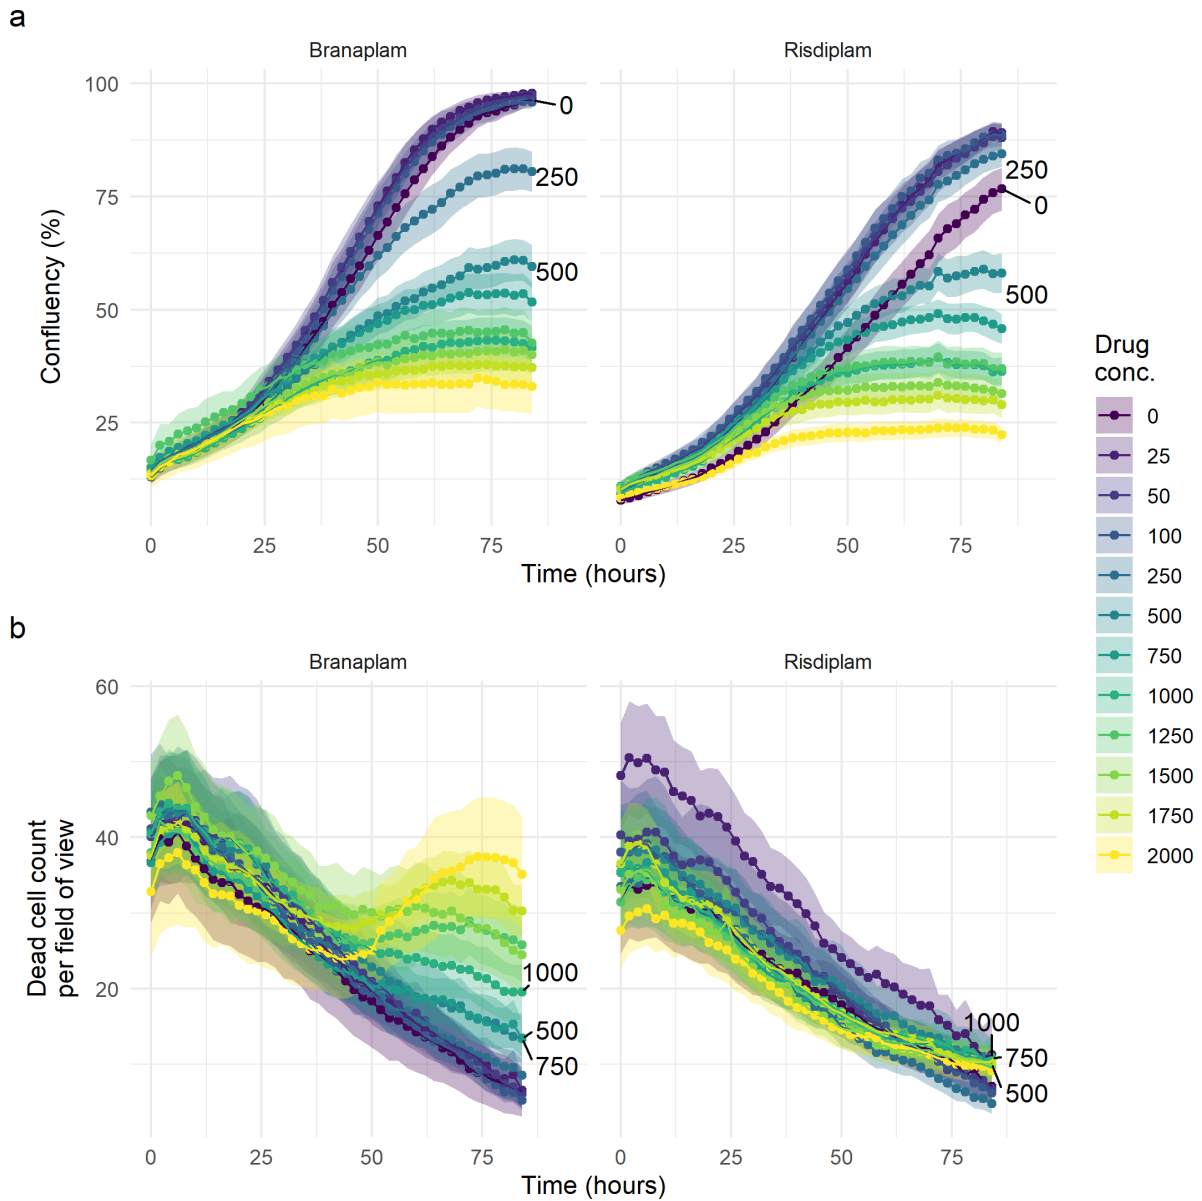

Supplementary Figure 5. The effect of branaplam and risdiplam on cell growth and acute cytotoxicity. (a) High-throughput image analysis for quantification of confluency over time with the treatment of branaplam (left) or risdiplam (right). The drug concentration is represented by the color, with key concentrations labelled on the plot. (b) Quantification of DNA labelling of dead cells. Source data are provided as a Source Data file.

## Supplementary Figure 6

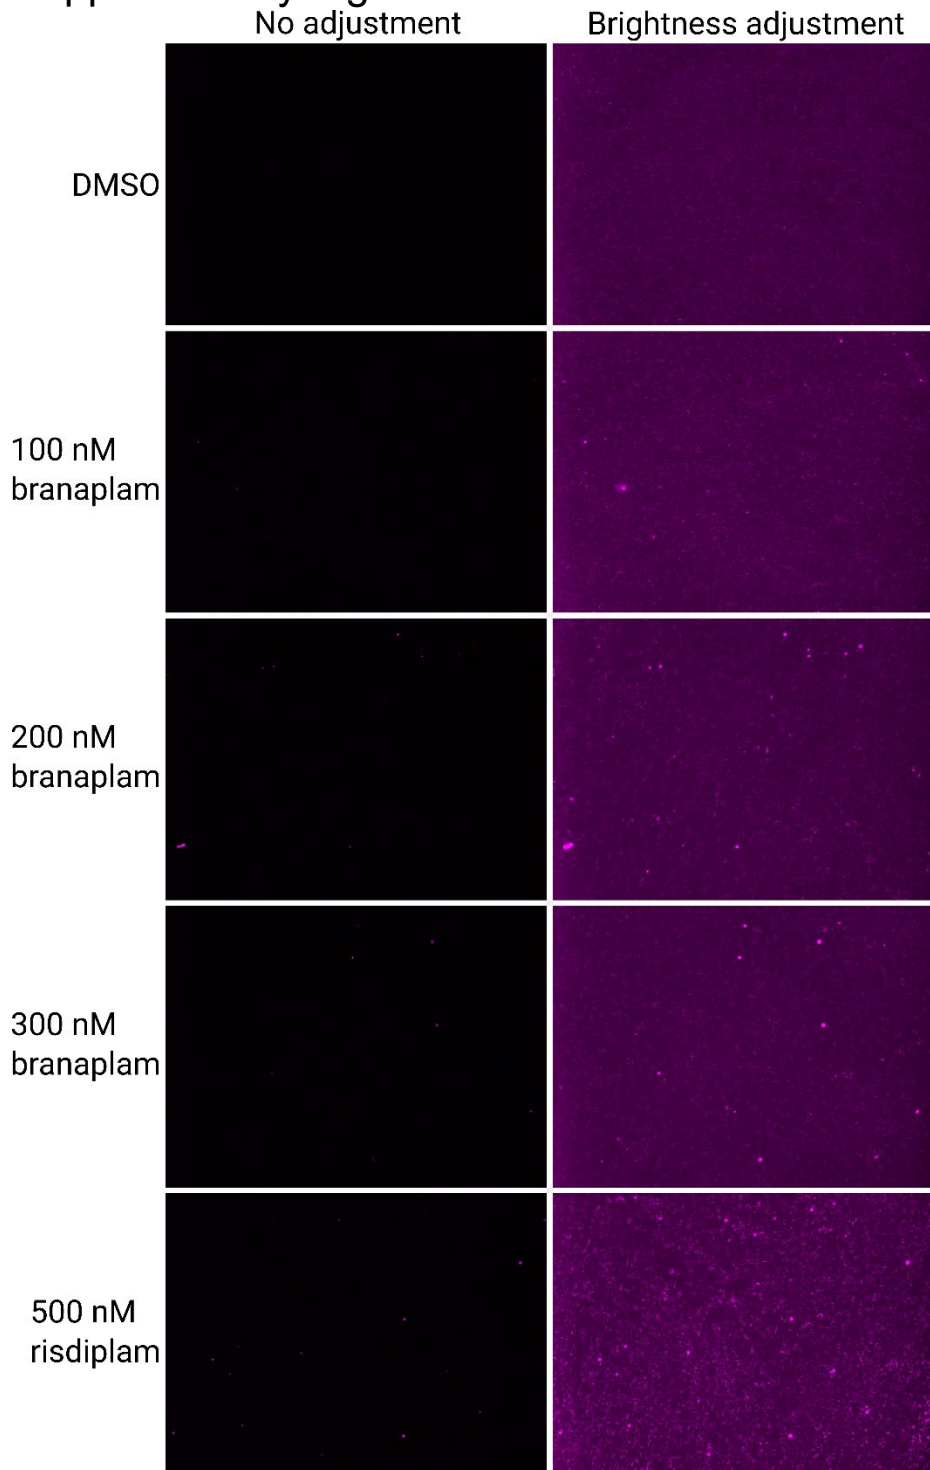

Supplementary Figure 6. The effect of selected branaplam and risdiplam concentrations on cells treated for two weeks at confluency. Images are shown with no adjustment, highlighting the brightly stained dead nuclei, or with a brightness adjustment to highlight the background autofluorescence.



# Supplementary Figure 7

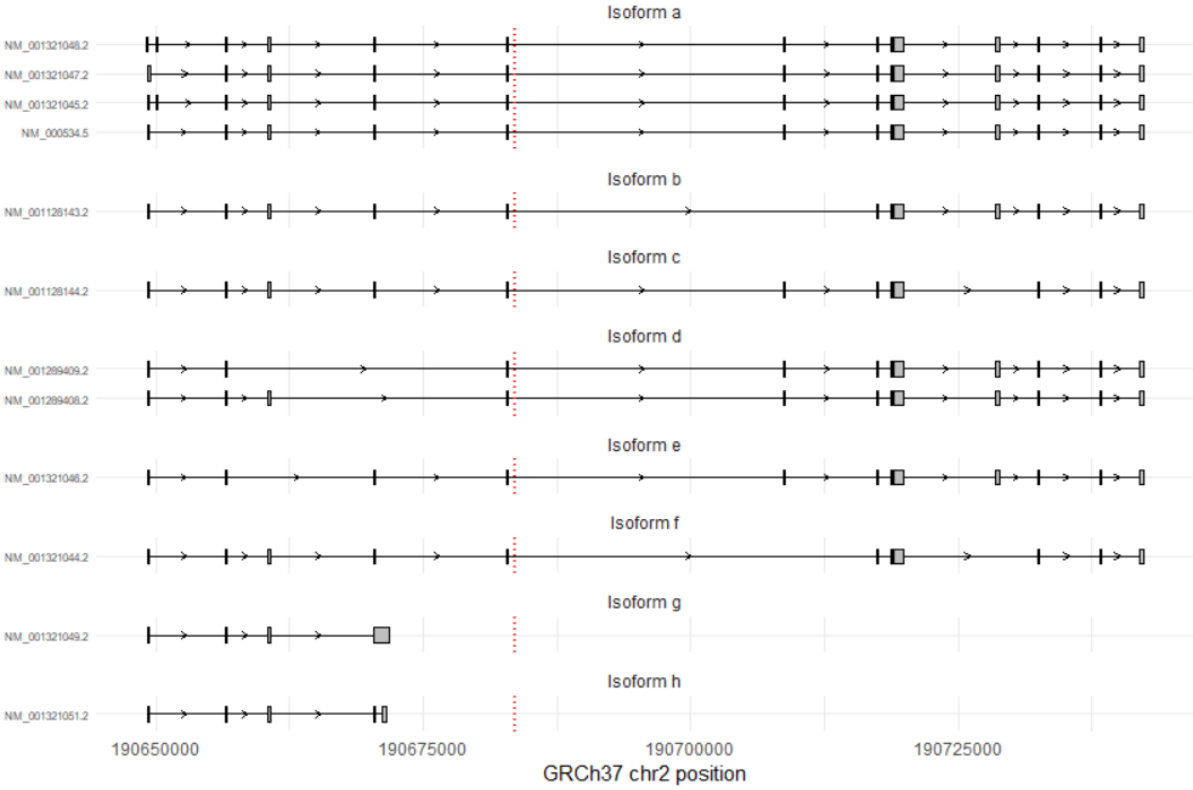

Supplementary Figure 7. *PMS1* alternatively spliced isoforms. NCBI RefSeq curated transcripts for each *PMS1* isoform. The pseudodexon location is shown with the dashed red line.

# Supplementary Figure 8

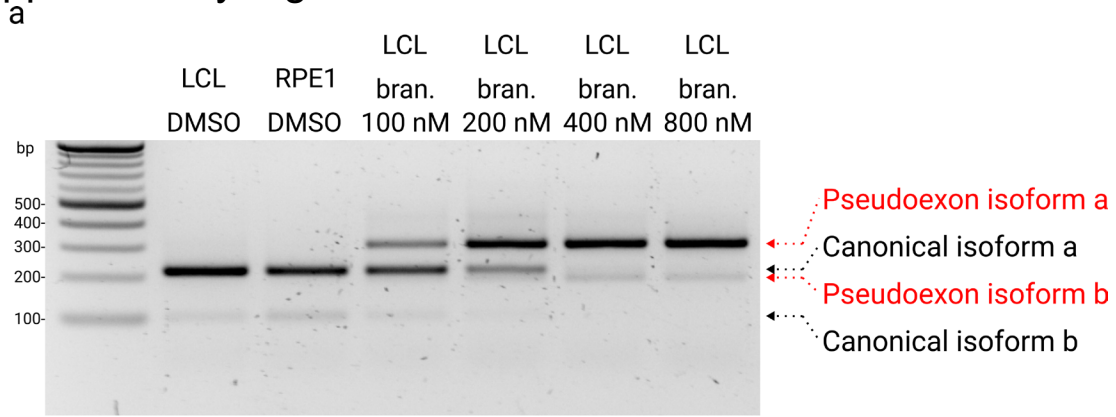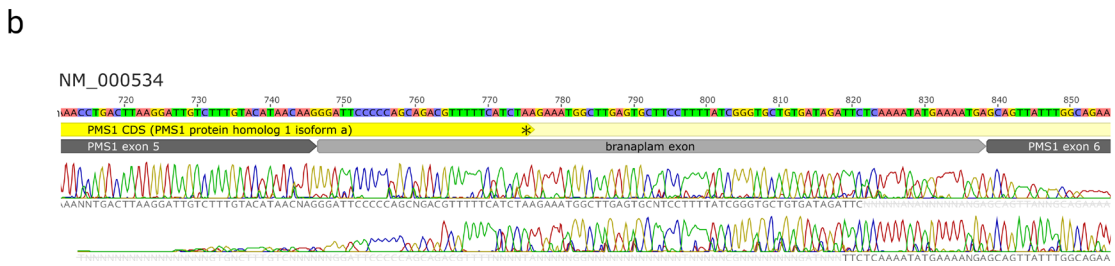

Supplementary Figure 8. *PMS1* pseudoexon. (a) RT-PCR from *PMS1* exon 5-7 showing the two variants, isoform a (includes exon 6) or isoform b (skips exon 6) in LCLs or RPE1 in DMSO control cells and the formation of pseudoexon products (red label) for both isoform a and b across increasing branaplam concentrations in LCLs. The data are from a single experiment. (b) Sanger sequencing traces from an isolated band of pseudoexon inclusion with a PCR from *PMS1* exon 5-6 PCR, with the termination codon indicated by a star. Source data are provided as a Source Data file.

## Supplementary Figure 9

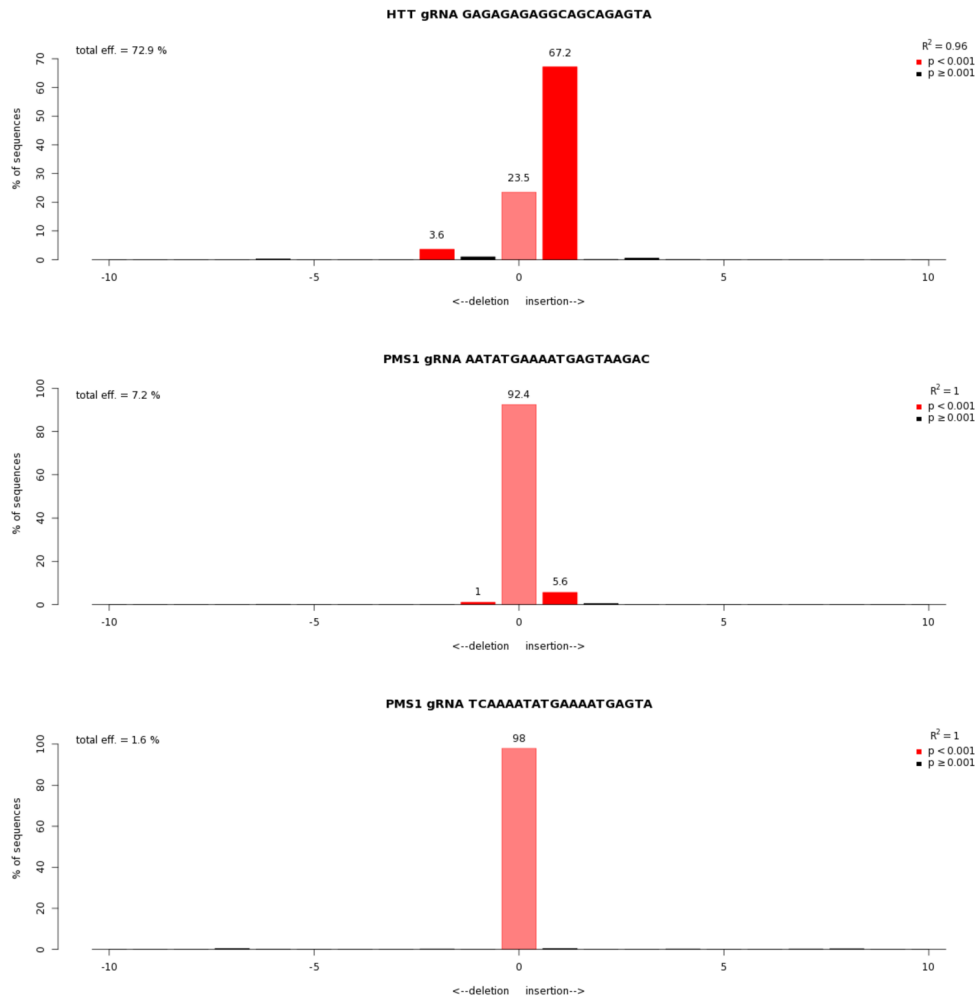

Supplementary Figure 9. Editing outcomes for *HTT* and *PMS1* direct pseudoexon editing by sanger sequencing and quantified by Sanger sequencing trace decomposition. *PMS1* pseudoexon gRNA 1 also targets an intergenic region on chromosome 13, but editing was not quantified.

## Supplementary Figure 10

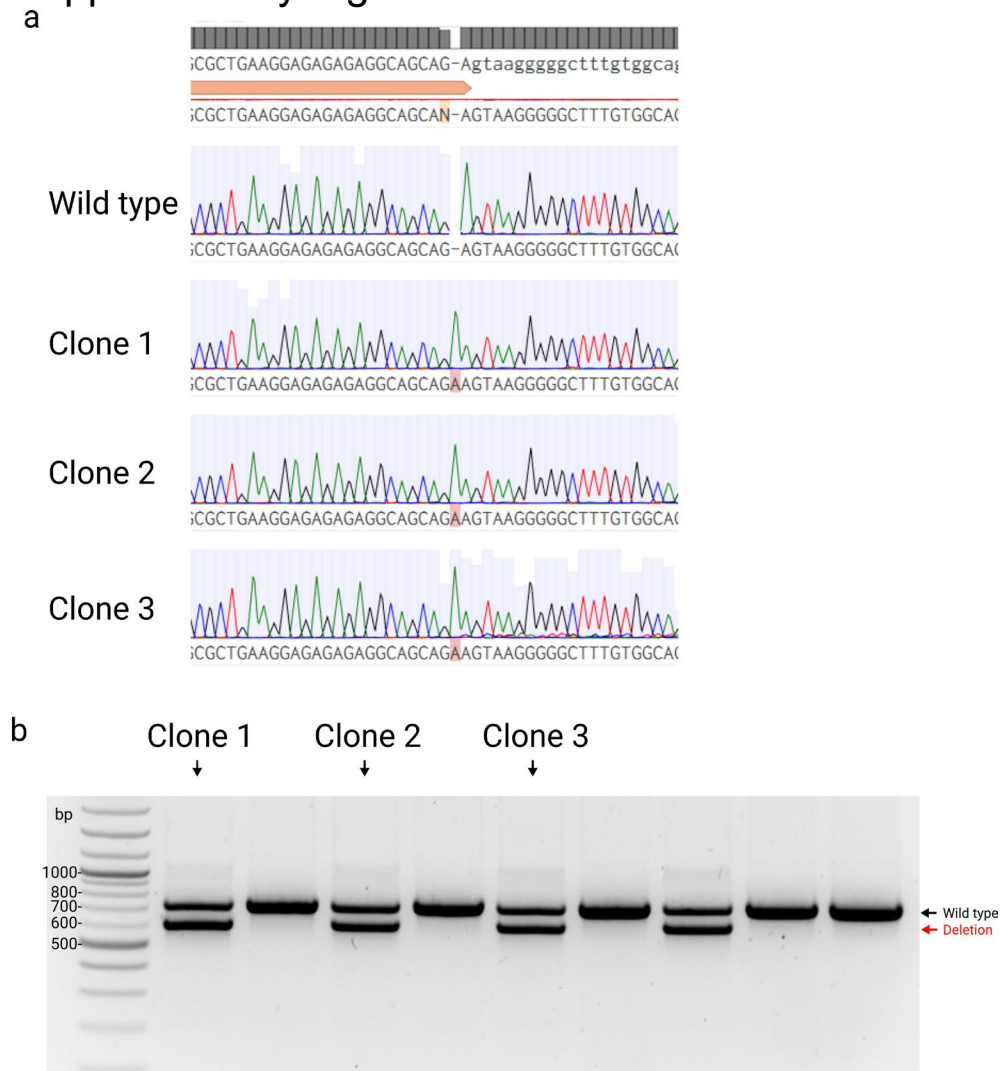

Supplementary Figure 10. Edited cell clones for *HTT* and *PMS1* pseudoexon disruption. (a) Sanger sequencing for three *HTT* edited clones. (b) PCR of *PMS1* genomic region surrounding pseudoexon location of several isolated cell lines. Cell lines heterozygously edited with a deletion of the pseudoexon ("del.") or wild type ("WT") are indicated, and the three clones used for experiments highlighted. The data are from a single experiment.

# Supplementary Figure 11

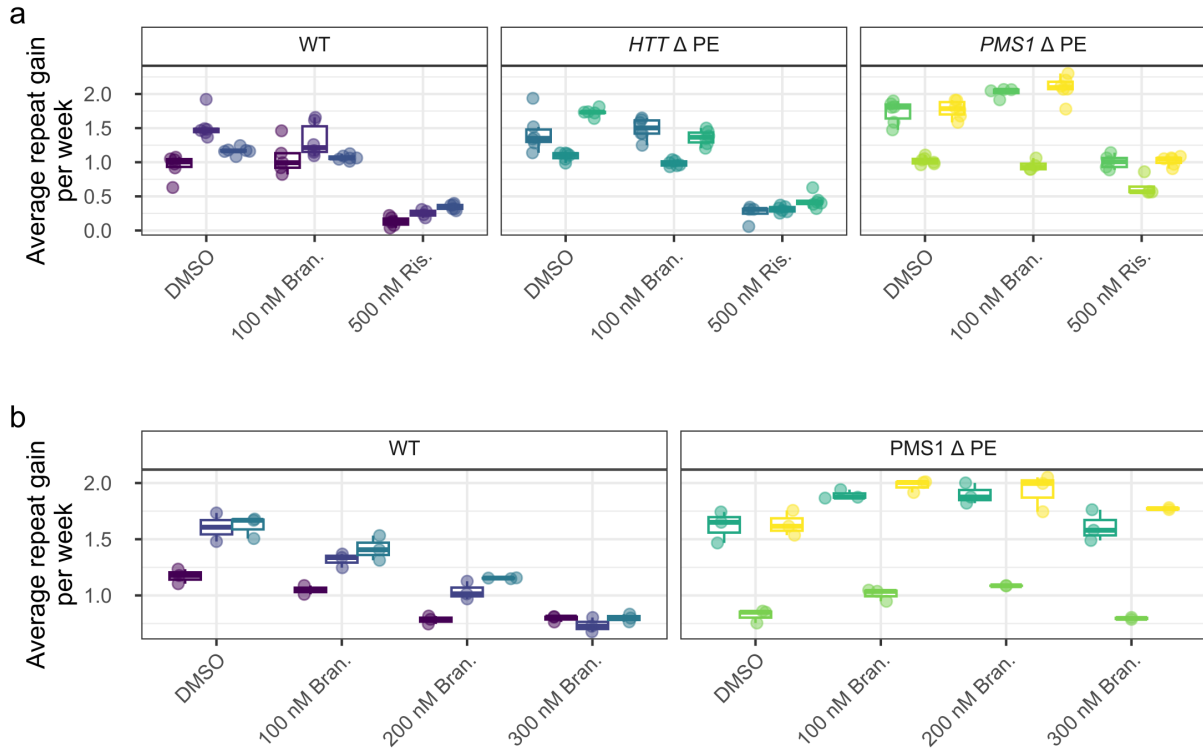

Supplementary Figure 11. Pseudoexon clone phenotypes. The average repeat gain per week after branaplam or risdiplam treatment for the different edited cell lines (dot color). (a) and (b) are equivalent to Figure 7d and Figure 7e without DMSO normalization, respectively. Box plots show the 25th and 75th percentiles (box), median (horizontal line), and range (whiskers, which are capped at 1.5x the inter-quartile range). Source data are provided as a Source Data file.

## Supplementary Figure 12

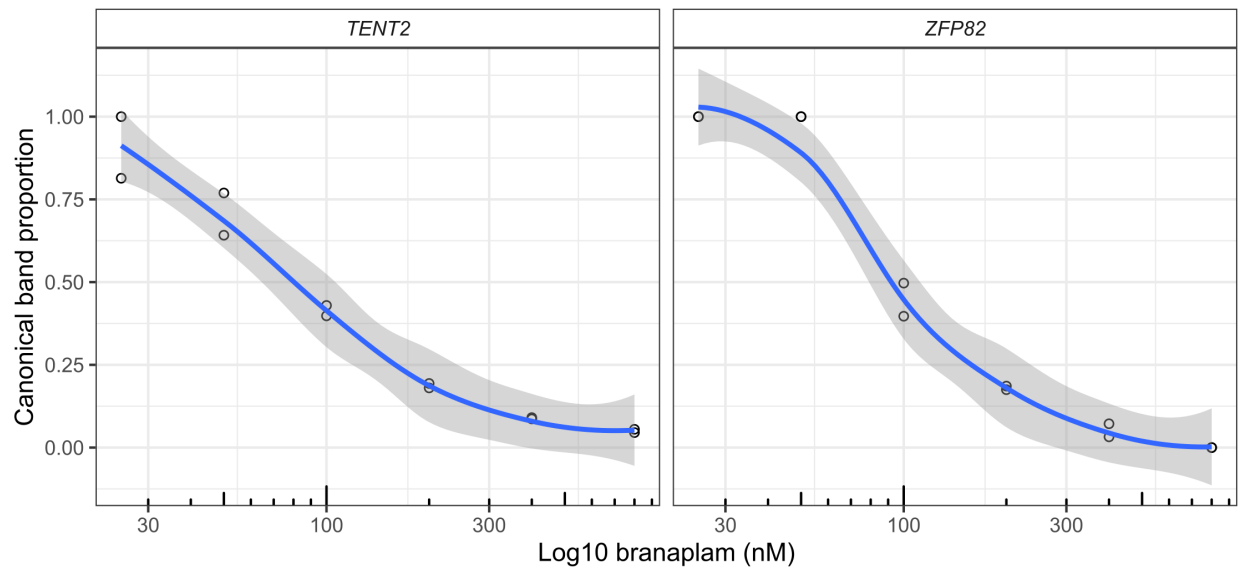

Supplementary Figure 12. Branaplam dose response for *TENT2* (left) and *ZFP82* (right) for canonical splice product after branaplam treatment. Source data are provided as a Source Data file.



## Supplementary Table 1: primers

| Name                                   | sequence                                                         |
|----------------------------------------|------------------------------------------------------------------|
| AAVS1 5' homology arm F                | CTGCCGTCTCTCTCTGAGT                                              |
| AAVS1 5' homology arm R                | GTGGGCTTGACTCGGTCAT                                              |
| CAG repeat sizing 1st PCR F (CAG1)     | ATGAAGGCCTTCGAGTCCCTCAAGTCCTTC                                   |
| CAG repeat sizing 2nd PCR F (CAG1)     | /56-FAM/ATGAAGGCCTTCGAGTCCCTCAAGTCCTTC                           |
| CAG repeat sizing 1st PCR R (EGFP R)   | GTCCAGCTCGACCAGGATG                                              |
| CAG repeat sizing 2nd PCR R (Hu3)      | GGCGGCTGAGGAAGCTGAGGA                                            |
| EGFP F                                 | CTGCTGCCCGACAACCAC                                               |
| EGFP probe                             | /56-FAM/ACCTGAGCA/ZEN/CCCAGTCCGCCCT/3IABkFQ/                     |
| EGFP R                                 | TGTGATCGCGCTTCTCGTT                                              |
| FAN1 KO NGS F                          | AGTGGTTGAAAAACGTGAGGCA                                           |
| FAN1 KO NGS R                          | CCATTGCAGCTTGACCCTGCT                                            |
| HTT exon 1 cloning primers with Sall F | CATGTACGgtcgacaccgccATGGCGACCCCTGGAAAAGCTG                       |
| HTT exon 1 cloning primers with Sall R | CATGTACGgtcgacTCGGTGCAGCGGCTCCTC                                 |
| HTT exon 49 cloning F                  | ACCATGGGGGATGCTGCACTGTATCAG                                      |
| HTT exon 49 cloning R                  | GGCCTCCAGGATGAAGTG                                               |
| HTT exon 49 F                          | GTCTCCAAACTGCCAGTCAT                                             |
| HTT exon 49-50 probe                   | /56-FAM/AACCCTTGAG/ZEN/GCCCTGTCT/3IABkFQ/                        |
| HTT exon 50 R                          | ACAAACTCTGTGGAGGAGACC                                            |
| Minigene SDM -1G>A F                   | GGCAACCCTTGAAgtaagaggcagctcgggag                                 |
| Minigene SDM -1G>A R                   | gctgcctttacTTCAAGGGTTGCCACCAC                                    |
| Minigene SDM -1G>C F                   | GGCAACCCTTGACgtaagaggcagctcgggag                                 |
| Minigene SDM -1G>C R                   | gctgcctttacGTCAAGGGTTGCCACCAC                                    |
| Minigene SDM -1G>T F                   | GGCAACCCTTGATgtaagaggcagctcgggag                                 |
| Minigene SDM -1G>T R                   | gctgcctttacATCAAGGGTTGCCACCAC                                    |
| MSH3 KO NGS F                          | ATGCCCGGCTTGATGCTGTATCG                                          |
| MSH3 KO NGS R                          | AGTGTCTCAAGCTGAAGAACACTGT                                        |
| PMS1 exon 5-6 probe                    | /56-FAM/TG TAC ATA A/ZEN/C AAG GCA GTT ATT TGG CAG A/3IABkFQ/    |
| PMS1 exon5 F                           | TCTCCTCATGAGCTTTGGTATCC                                          |
| PMS1 exon6 R                           | ACAGCAGTCCCCAGAACTGA                                             |
| PMS1 exon7 R                           | TGGTCTGCATCACACTTTGGA                                            |
| PMS1 int 5 F                           | AGGCACCACCTATGAACCAG                                             |
| PMS1 int 5 R                           | AGCAACAAGGATGGAAATGG                                             |
| PMS1 KO NGS F                          | GCTGAGGATGAATGCAAAATATAGGA                                       |
| PMS1 KO NGS R                          | TCAGAGTGGTACTGAAAGGATTCCA                                        |
| PPP1R12C exon 1 F                      | TCCAGCCCTCGTTGTCTG                                               |
| PPP1R12C exon 2 R                      | GTGCTGGACTCCACCAAC                                               |
| PPP1R12C rs34521018_A probe            | /5SUN/CCTGGTTCA/ZEN/CAGTGGCACCCCTGCTCC/3IABkFQ/                  |
| PPP1R12C rs34521018_G probe            | /56-FAM/CCTGGTTCA/ZEN/CAGTGGCGCCCTGC/3IABkFQ/                    |
| PuroR F                                | GAGTACAAGCCCCACGGTG                                              |
| PuroR probe                            | /56-FAM/TCGACGGTG/ZEN/TGGCGCGTGGC/3IABkFQ/                       |
| PuroR R                                | TGAGGAAGAGTTCTTGACAGC                                            |
| SDHA F                                 | TTTGATGCAGTGGTGGTAGG                                             |
| SDHA probe                             | /56-FAM/AG CCT AAG A/ZEN/T GAG AGT TCA AGT TGA GTT TGG /3IABkFQ/ |
| SDHA R                                 | CAGAGCAGCATTGATTCCTC                                             |



## Supplementary Table 2: sgRNAs

| Target                              | sgRNA seq            | PAM |
|-------------------------------------|----------------------|-----|
| <i>FAN1</i>                         | TGCATGGAGTAACATCCAAG | NGG |
| <i>MSH3</i>                         | AAATTGCCCGACATAGAGAG | NGG |
| <i>PMS1</i>                         | CAGAGTATCAGATCACAAGA | NGG |
| <i>HTT</i> pseudoexon 1             | GAGAGAGAGGCAGCAGAGTA | NGG |
| <i>PMS1</i> pseudoexon 1            | AATATGAAAATGAGTAAGAC | NGG |
| <i>PMS1</i> pseudoexon 2            | TCAAAATATGAAAATGAGTA | NGA |
| <i>PMS1</i> pseudoexon flanking LHS | TTAGATGAAAAACGTCTGCT | NGG |
| <i>PMS1</i> pseudoexon flanking RHS | CAAAGAATCAACAGTGTAGA | NGG |
