# Supplementary material for: Splice modulators target PMS1 to reduce somatic expansion of the Huntington’s disease-associated CAG repeat
Source: PubMed Central journal article supplement (PMC11015039; doi:10.1038/s41467-024-47485-0), 2024-04-12
Supplement: 41467_2024_47485_MOESM3_ESM.pdf [file 41467_2024_47485_MOESM3_ESM.pdf]

File Name: NCOMMS-23-33770A\_Source\_Data.xlsx

Description: Source Data file

File Name: NCOMMS-23-33770A\_Supplementary\_Information.pdf

Description: Supplementary figures and tables.

File Name: Supplementary\_Data\_1.xlsx

Description: Branaplam-responsive exons from Monteys et al., 2021 (Extended Data Table 1 & 2); Bhattacharyya et al. (Supplementary Data 2, HTT-C2), 2021; Keller et al., 2022 (Supplementary Data Table 2 & 3); and Ottesen et al., 2023 (Supplementary Table S5, S6, S7). A combined table of each drug responsive exon, the gene, the type (pseudoexon versus existing annotated exon) and the GRCh37/hg19 coordinates.

File Name: Supplementary\_Data\_2.xlsx

Description: SpliceAI predictions for the effect of variants on the splicing of branaplam responsive exons. The variant coordinates are GRCh37/hg19 position.
